1 **CLASSIFICATION:**

2  
3 Biological Sciences / Genetics

4  
5  
6 **TITLE:**

7  
8 Sex Chromosome Dosage Effects on Gene Expression in Humans

9  
10  
11  
12 **AUTHORS AND AUTHOR AFFILIATIONS:**

13  
14 Armin Raznahan<sup>\*1</sup>, Neelroop Parikshak<sup>2</sup>, Vijayendran Chandran<sup>3</sup>, Jonathan  
15 Blumenthal<sup>1</sup>, Liv Clasen<sup>1</sup>, Aaron Alexander-Bloch<sup>1</sup>, Andrew Zinn<sup>4</sup>, Danny  
16 Wangsa<sup>5</sup>, Jasen Wise<sup>6</sup>, Declan Murphy<sup>7</sup>, Patrick Bolton<sup>7</sup>, Thomas Ried<sup>5</sup>, Judith  
17 Ross<sup>8</sup>, Jay Giedd<sup>9</sup>, Daniel Geschwind<sup>2</sup>

- 18  
19 1. *Developmental Neurogenomics Unit, National Institute of Mental Health, NIH, Bethesda, MD,*  
20 *USA*  
21 2. *Neurogenetics Program, Department of Neurology and Center for Autism Research and*  
22 *Treatment, Semel Institute, David Geffen School of Medicine, University of California Los*  
23 *Angeles, Los Angeles, CA, USA*  
24 3. *Department of Pediatrics, School of Medicine, University of Florida, Gainesville, FL 32610-*  
25 *0296, USA*  
26 4. *McDermott Center for Human Growth and Development and Department of Internal*  
27 *Medicine, University of Texas Southwestern Medical School, TX, USA*  
28 5. *Genetics Branch, Center for Cancer Research, National Cancer Institute, NIH, Bethesda,*  
29 *MD, USA*  
30 6. *Qiagen, Frederick, MD, USA*  
31 7. *Institute of Psychiatry, Psychology and Neuroscience, King's College London, University of*  
32 *London, UK*  
33 8. *Department of Pediatrics, Thomas Jefferson University, Philadelphia, PA, USA*  
34 9. *Department of Psychiatry, UC San Diego, La Jolla, CA, USA*

35  
36  
37 **CORRESPONDING AUTHOR:**

38  
39 Armin Raznahan MD PhD, Developmental Genomics Unit, Rm 4D18, Building  
40 10, 10 Center Drive, National Institute of Mental Health, NIH, Bethesda, MD,  
41 USA, T: 3014357927, E: raznahan@mail.nih.gov

42  
43  
44 **KEYWORDS:**

45  
46 Sex chromosomes; X-chromosome; Y-chromosome; dosage compensation; X-  
47 inactivation; sex differences; Turner syndrome: Klinefelter syndrome: ZFX

49 **ABSTRACT:**

50 A fundamental question in the biology of sex-differences has eluded direct study  
51 in humans: how does sex chromosome dosage (SCD) shape genome function?  
52 To address this, we developed a systematic map of SCD effects on gene  
53 function by analyzing genome-wide expression data in humans with diverse sex  
54 chromosome aneuploidies (XO, XXX, XXY, XYY, XXYY). For sex chromosomes,  
55 we demonstrate a pattern of obligate dosage sensitivity amongst evolutionarily  
56 preserved X-Y homologs, and update prevailing theoretical models for SCD  
57 compensation by detecting X-linked genes whose expression increases with  
58 decreasing X- and/or Y-chromosome dosage. We further show that SCD-  
59 sensitive sex chromosome genes regulate specific co-expression networks of  
60 SCD-sensitive autosomal genes with critical cellular functions and a  
61 demonstrable potential to mediate previously documented SCD effects on  
62 disease. Our findings detail wide-ranging effects of SCD on genome function with  
63 implications for human phenotypic variation.

64

65

66

67

68

69

70

71

72 **SIGNIFICANCE STATEMENT:**

73 Sex chromosome dosage (SCD) effects on human gene expression are central  
74 to the biology of sex differences and sex chromosome aneuploidy syndromes,  
75 but challenging to study given the co-segregation of SCD and gonadal status.  
76 We address this obstacle by systematically modelling SCD effects on genome-  
77 wide expression data from a large and rare cohort of individuals with diverse  
78 SCDs (XO, XX, XXX, XXXX, XY, XXY, XYY, XXYY, XXXXY). Our findings  
79 update current models of sex chromosome biology by (i) pinpointing a core set of  
80 X- and Y-linked genes with “obligate” SCD sensitivity, (ii) discovering several  
81 non-canonical modes of X-chromosome dosage compensation, and (iii)  
82 dissecting complex regulatory effects of X-chromosome dosage on large  
83 autosomal gene networks with key roles in cellular functioning.

84

85

86

87

88

89

90

91

92

93

94

## 95 INTRODUCTION

96 Disparity in SCD is fundamental to the biological definition of sex  
97 throughout much of the animal kingdom. In almost all eutherian mammals,  
98 females carry two X-chromosomes, while males carry an X- and a Y-  
99 chromosome: presence of the Y-linked SRY gene determines a testicular  
100 gonadal phenotype, while its absence allows development of ovaries (1). Sexual  
101 differentiation of the gonads leads to hormonal sex-differences that have  
102 traditionally been considered the major proximal cause for extra-gonadal  
103 phenotypic sex-differences. However, diverse studies, including recent work in  
104 transgenic mice that uncouple Y-chromosome and gonadal status, have revealed  
105 direct SCD effects on several sex-biased metabolic, immune and neurological  
106 phenotypes (2).

107 These findings - together with reports of widespread transcriptomic  
108 differences between pre-implantation XY and XX embryos (3, 4) - suggest that  
109 SCD has gene regulatory effects independently of gonadal status. However,  
110 genome-wide consequences of SCD remain poorly understood, especially in  
111 humans, where experimental dissociation of SCD and gonadal status is not  
112 possible. Understanding these regulatory effects is critical for clarifying the  
113 biological underpinnings of phenotypic sex-differences, and the clinical features  
114 of sex chromosome aneuploidy (5) [SCA, e.g. Turner (XO) and Klinefelter (XXY)  
115 syndrome], which can both manifest as altered risk for several common  
116 autoimmune and neurodevelopmental disorders (e.g. systemic lupus  
117 erythematosus and autism spectrum disorders) (6, 7). Here, we explore the

118 genome wide consequences of SCD through comparative transcriptomic  
119 analyses amongst humans across a range of dosages including typical XX and  
120 XY karyotypes, as well as several rare SCA syndromes associated with 1, 3, 4 or  
121 5 copies of the sex chromosomes. We harness these diverse karyotypes to  
122 dissect the architecture of dosage compensation amongst sex chromosome  
123 genes, and to systematically map the regulatory effects of SCD on autosomal  
124 gene expression in humans.

125 We examined gene expression profiles in a total of 470 lymphoblastoid  
126 cell lines (LCLs), from (i) a core sample of 68 participants (12 XO, 10 XX, 9 XXX,  
127 10 XY, 8 XXY, 10 XYY, 9 XXYY) yielding for each sample genome-wide  
128 expression data for 19,984 autosomal and 894 sex-chromosome genes using the  
129 Illumina oligonucleotide Beadarray platform (**Methods**), and (ii) an independent  
130 set of validation/replication samples from 402 participants (4 XO, 146 XX, 22  
131 XXX, 145 XY, 33 XXY, 16 XYY, 17 XXYY, 8 XXXY, 10 XXXXY) with quantitative  
132 reverse transcription polymerase chain reaction (qPCR) measures of expression  
133 for genes of interest identified in our core sample (**Table S1, Methods**).

134

## 135 **RESULTS**

### 136 **Extreme Dosage Sensitivity of Evolutionarily Preserved X-Y Gametologs**

137 To first verify our study design as a tool for probing SCD effects on gene  
138 expression, and to identify core SCD-sensitive genes, we screened all 20,878  
139 genes in our microarray dataset to define which, if any, genes showed a  
140 persistent pattern of significant differential expression (DE) across all unique

141 pairwise group contrasts involving a disparity in either X- or Y-chromosome  
142 dosage (n=15 and n=16 contrasts respectively, **Fig. 1a**). Disparities in X-  
143 chromosome dosage were always accompanied by statistically significant DE in  
144 4 genes, which were all X-linked: *XIST* (the orchestrator of X-inactivation) and 3  
145 other known genes known to escape X-chromosome inactivation (*PUDP*,  
146 *KDM6A*, *EIF1AX*) (8). Similarly, disparities in Y-chromosome dosage always led  
147 to statistically-significant DE in 6 genes, which were all Y-linked: *CYorf15B*,  
148 *DDX3Y*, *TMSB4Y*, *USP9Y*, *UTY*, and *ZFY*. Observed expression profiles for  
149 these 10 genes perfectly segregated all microarray samples by karyotype group  
150 (**Fig. 1b**), and could be robustly replicated and extended using available qPCR  
151 data for 5/5 of these genes in the independent sample of 402 LCLs from  
152 participants with varying SCD (**Fig. S1, Methods**).

153 Strikingly, 8 of the 10 genes showing obligatory SCD sensitivity (excepting  
154 *XIST* and *PUPD*) are members of a class of 16 sex-linked genes with homologs  
155 on both the X and Y chromosomes (i.e. 16 X-Y gene pairs, henceforth  
156 gametologs) (9) that are distinguished from other sex-linked genes by (i) their  
157 selective preservation in multiple species across ~300 million years of sex  
158 chromosome evolution to prevent male-female dosage disparity, (ii) the breadth  
159 of their tissue expression from both sex chromosomes; and (iii) their key  
160 regulatory roles in transcription and translation (9, 10) (**Fig. 1c**). Broadening our  
161 analysis to all 14 X-Y gametolog pairs present in our microarray data found that  
162 these genes as a group exhibit a heightened degree of SCD-sensitivity that  
163 distinguishes them from other sex-linked genes (**Fig. 1d, Methods**). These

164 findings provide direct evidence that the evolutionary maintenance, broad tissue  
165 expressivity and enriched regulatory functions of X-Y gametologs (10) are indeed  
166 accompanied by a distinctive pattern of dosage sensitivity, which firmly  
167 establishes these genes as candidate regulators of SCD effects on wider  
168 genome function.

169

170 **Figure 1 (next page). Consistent Gene Expression Changes with Altered Sex Chromosome**

171 **Dosage. a)** Cross table showing all unique pairwise SCD group contrasts within our microarray  
172 dataset, color coded for their involvement of changes in X- and Y-chromosome count. **b)** Two-  
173 dimensional expression heat-map for the 10 genes showing differential expression across all  
174 contrasts that involve disparity in X or Y-chromosome count. Column colors encode SCD group  
175 membership for each sample. Rows detail gene expression across all SCD samples as a log 2  
176 fold change relative to the mean expression in XY males. **c)** Table providing Gene ID, location,  
177 function and homolog annotations for the 10 genes that showed obligate SCD sensitivity. Eight  
178 genes in this set are members of X-Y gametolog gene pairs. **d)** Density plots showing observed  
179 mean SCD sensitivity of the 14 gametolog genes in our study (red line), vs. null distribution (black  
180 line) of mean SCD sensitivity for 10,000 randomly sampled sets of non-gametolog sex-linked  
181 genes of equal size. Results are provided separately for X- and Y-chromosomes. For both  
182 chromosomes, the mean SCD sensitivity of the gametolog gene set is greater is than that of all  
183 10k permuted gene sets.

184

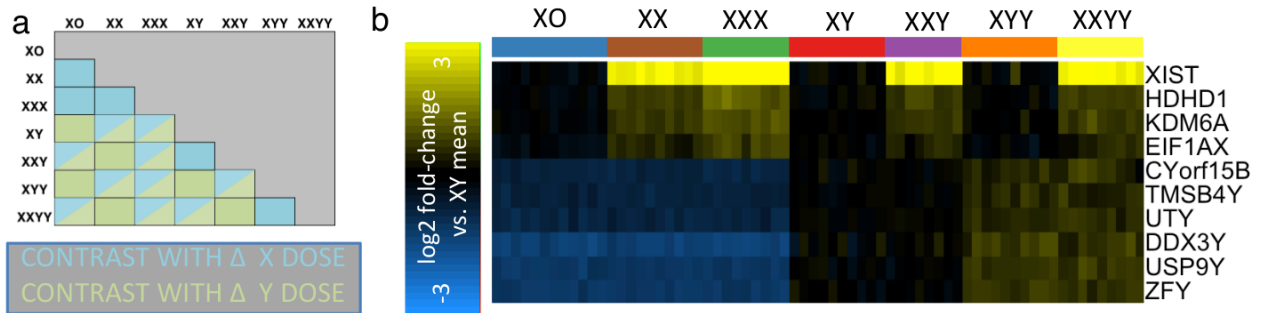

**c**

| Gene_Name (Alias) | Entrez_ID | Chromosome | Probe_Start | Probe_End | Functions                                                  | Gametolog_N   | Functions                                                  |
|-------------------|-----------|------------|-------------|-----------|------------------------------------------------------------|---------------|------------------------------------------------------------|
| PUDP (HDHD1)      | 8226      | X          | 6967201     | 6967250   | encodes protein of unknown biological function             | -             | -                                                          |
| KDM6A (UTX)       | 7403      | X          | 44970808    | 44970857  | catalyzes the demethylation of tri/dimethylated histone H3 | UTY           | protein-protein interactions                               |
| XIST              | 7503      | X          | 73040921    | 73040970  | essential for initiation and spread of X inactivation      | -             | -                                                          |
| EIF1AX            | 1964      | X          | 20150300    | 20150326  | essential translation initiation factor                    | EIF1AY        | translation initiation                                     |
| Gene_Name (Alias) | Entrez_ID | Chromosome | Probe_Start | Probe_End | Functions                                                  | Gametolog_N   | Functions                                                  |
| ZFY               | 7544      | Y          | 2849596     | 2849645   | transcription factor                                       | ZFX           | transcription factor                                       |
| USP9Y             | 8287      | Y          | 14971985    | 14972034  | ubiquitination                                             | USP9X         | ubiquitination                                             |
| DDX3Y             | 8653      | Y          | 15032184    | 15032233  | RNA and ATP binding, hydrolysis                            | DDX3X         | RNA helicase, transcriptional regulation and translation   |
| UTY               | 7404      | Y          | 15360382    | 15360431  | protein-protein interactions                               | KDM6A (UTX)   | catalyzes the demethylation of tri/dimethylated histone H3 |
| TMSB4Y (TB4Y)     | 9087      | Y          | 15817595    | 15817644  | uncharacterized                                            | TMSB4X (TB4X) | actin polymerization, cell proliferation/differentiation   |
| TXLNGY (CYorf15B) | 84663     | Y          | 21765838    | 21765887  | pseudogene                                                 | TXLNG         | transcriptional regulation, intracellular trafficking      |

**d**

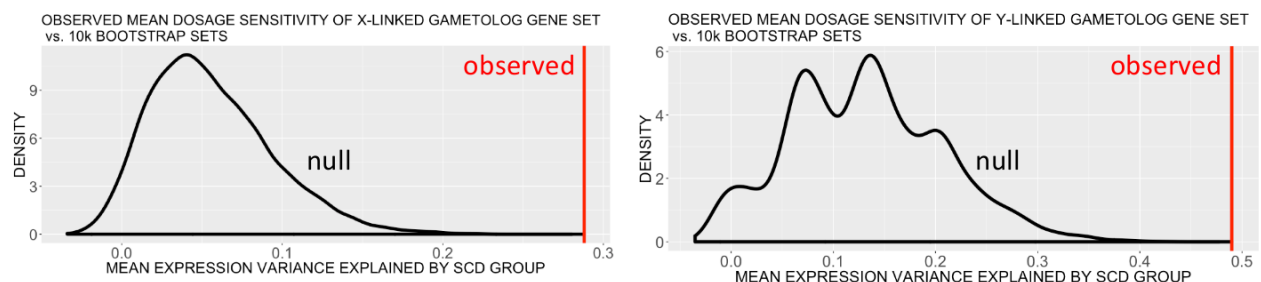

185  
186  
187

188 **Observed Sex Chromosome Dosage Effects on X- and Y-chromosome**  
189 **Genes Modify Current Models of Dosage Compensation**

190 We next harnessed our study design to test the canonical (“Four Class”)  
191 model for SCD compensation, which defines four mutually-exclusive classes of



192 sex chromosome genes that would be predicted to have differing responses to  
193 changing SCD(11): (i) pseudoautosomal region (PAR) genes, (ii) Y-linked genes,  
194 (iii) X-linked genes that undergo X-chromosome inactivation (XCI), and (iv) X-  
195 linked genes that “escape” XCI (XCIE). Under the Four Class Model, PAR genes  
196 would be predicted to increase their expression with increases in X- or Y-  
197 chromosome count, whereas expression of Y-linked genes would increase  
198 linearly with mounting Y-chromosome count. Due to the non-binary nature of  
199 gene silencing with XCI (12), theorized SCD effects on expression of XCI and  
200 XCIE genes represent extreme ends of an X-chromosome dosage sensitivity  
201 continuum: an X-linked genes that undergoes full silencing with XCI would show  
202 no expression change with changes in X-chromosome dosage, whereas an X-  
203 linked gene that undergoes complete escape from X-chromosome inactivation  
204 would show a linear increase in expression with increasing X-chromosome count.

205 To test this canonical “Four Class Model” we considered all sex  
206 chromosome genes and performed unsupervised *k*-means clustering of genes by  
207 their mean expression in each of the 7 karyotype groups represented in our  
208 microarray dataset, and compared this empirically-defined grouping with that  
209 given *a priori* by the Four Class Model (**Methods**). *k*-means clustering  
210 distinguished 5 reproducible (color-coded) clusters of SCD-sensitive sex-  
211 chromosome genes that overlapped strongly with gene groups predicted by the  
212 Four Class Model, from a large left-over cluster of 773 genes with low or  
213 undetectable expression levels in most samples (median detection rate of 4/68  
214 samples), and no significant SCD sensitivity (**Table S2, Fig. 2a,b, Fig. S2a,b**).

215           The 5 SCD-sensitive groups of sex chromosome genes detected by k-  
216 means were highly reproducible over k-means analyses across 1000 bootstrap  
217 draws from our sample pool (**Fig. S2b**), and consisted of: an Orange cluster of  
218 PAR genes, a Pink cluster of Y-linked genes (especially enriched for Y  
219 gametologs, odds ratio=5213,  $p=1.3 \times 10^{-15}$ ), a Green cluster enriched for known  
220 XCI genes (especially X gametologs, odds ratio=335,  $p=3.4 \times 10^{-11}$ ), and a  
221 Yellow cluster enriched for known XCI genes. The X-linked gene responsible for  
222 initiating X-inactivation - XIST - fell into its own Purple “cluster” (**Fig. 2b**). For all  
223 but the Orange cluster of PAR genes, observed patterns of gene-cluster dosage  
224 sensitivity across karyotype groups deviated from those predicted by the Four  
225 Class Model (**Fig. 2c**).

226           Mean Expression for the Pink cluster of Y-linked genes increased in a  
227 stepwise fashion with Y-chromosome dosage, but deviated from the Four Class  
228 Model prediction by showing a sub-linear relationship with Y-chromosome count  
229 – indicating that these Y-linked genes may be subject to active dosage  
230 compensation. Fold-changes observed by microarray for 3/3 of these Y-linked  
231 genes were highly correlated across group contrasts with fold-changes observed  
232 between karyotype groups by qPCR in an independent sample of 402  
233 participants with varying SCD (**Methods, Fig. S2d**).

234           Observed expression profiles the Yellow and Green clusters of X-linked  
235 genes also deviated from predictions of the Four Class Model predictions (**Table**  
236 **S2, Fig. 2c,d**). Linear models for X- and Y-chromosome dosage effects on  
237 expression (**Methods**) indicated that the XCI-enriched Yellow cluster was highly

238 sensitive to SCD ( $F=47.7$ ,  $p<2.2*10^{-16}$ ), and that the expression of this cluster  
239 was significantly *inversely* related to X-chromosome dosage at the level of both  
240 mean cluster expression (coefficient for linear effect of X-chromosome count on  
241 expression =  $-0.12$ ,  $p=3.8*10^{-15}$ ) and the individual expression profile of 60/66  
242 genes within the cluster ( $p<0.05$  for negative linear effect of X count on  
243 expression). This observation suggests that increasing X copy number may not  
244 solely involve silencing of these genes from the additional inactive X-  
245 chromosome, but a further repression of their expression from the single active  
246 X-chromosome.

247 Remarkably, expression of the XCI gene cluster was also significantly  
248 decreased by presence of a Y-chromosome, at the level of both mean cluster  
249 expression (coefficient for linear effect of Y-chromosome count on expression = -  
250  $0.09$ ,  $p= 1.4*10^{-14}$ ) and expression profiles of 48/66 individual cluster genes  
251 ( $p<0.05$  for negative linear effect of Y count on expression). The Green XCIE  
252 cluster manifested an inverted version of this effect whereby increases in Y  
253 chromosome dosage were associated with increased gene expression ( $p<$   
254  $6.2*10^{-11}$  for mean cluster expression and  $p<0.05$  for 23/39 cluster genes) -  
255 providing the first evidence that Y-chromosome status can influence the  
256 expression level of X-linked genes independently of circulating gonadal factors.  
257 Mean expression of Green XCIE cluster genes also scaled sub-linearly with X-  
258 chromosome dosage. For both Green and Yellow clusters, we established that  
259 observed patterns of dosage sensitivity held when analysis was restricted to X-  
260 linked genes with only high confidence annotations for XCIE and XCI status

261 (respectively) (**Fig 2d**) – suggesting that observed expression profiles was  
262 unlikely to be explained by misclassification of X-linked genes by XCI status. To  
263 further probe the sublinear relationship between XCIE Green cluster expression  
264 and X-chromosome dosage, we integrated our findings with those of a recently-  
265 published (13) survey of allelic expression imbalance analyses from female  
266 LCLs with skewed X-inactivation (**Text S1, Fig. S2**). This analysis revealed that  
267 the magnitude of observed sub-linear relationships between Green cluster gene  
268 expression values and X-chromosome dosage is consistent with independent  
269 measurements of incomplete of escape from XCI (12, 13).

270 To determine the reproducibility and convergent validity of the unexpected  
271 modes of dosage sensitivity observed for XCI (reduced expression with  
272 increasing X- and Y-chromosome dosage) and XCIE (increased expression with  
273 increasing Y-chromosome dosage) clusters, we first confirmed that the distinct  
274 expression profiles for these two clusters were reproducible at the level of  
275 individual genes and samples. Indeed, unsupervised clustering of microarray  
276 samples based on expression of XCI and XCIE cluster genes relative to XX  
277 controls distinguished three broad karyotype groups: females with one X-  
278 chromosome (XO), males with one X-chromosome (XY, XYY), and individuals  
279 with extra X-chromosome (XXX, XXY, XXYY) (**Fig. 2e**). We were also able to  
280 validate our data-driven discovery of XCI and XCIE gene clusters against  
281 independently generated X-chromosome annotations (**Fig. 2f**), which detail 3  
282 distinct genomic predictors of inactivation status for X-linked genes. Specifically,  
283 XCI cluster genes were relatively enriched (and XCIE cluster genes relatively

284 impoverished) for (i) having lost a Y-chromosome homolog during evolution (14)  
285 ( $X^2 = 10.9$ ,  $p=0.01$ ), (ii) being located in older evolutionary strata of the X-  
286 chromosome (15) ( $X^2 = 22.6$ ,  $p=0.007$ ), and (iii) bearing heterochromatic markers  
287 (16) ( $X^2 = 18.35$ ,  $p=0.0004$ ).

288 Finally, qPCR assays in LCLs from an independent sample of 402  
289 participants with varying SCD validated the fold changes observed in microarray  
290 data for 5/6 of the most SCD-sensitive XCIE and XCI cluster genes (**Methods**,  
291 **Fig. S2e**). To independently extend these observations, we measured gene  
292 expression by qPCR in novel karyotype groups not represented in our microarray  
293 dataset (XXXY, XXXXY, **Methods**) and were able to confirm reduction in  
294 expression with greater X-chromosome dosage for 2 of 3 XCI cluster genes (**Fig**  
295 **S2f**, *NGFRAP1*, *CXorf57*), and Y-chromosome dosage effects upon expression  
296 for 5 of 6 X-linked genes from XCI and XCIE clusters (**Fig S2g**, downregulation:  
297 *NGFRAP1*, *CXorf57* | up-regulation: *PIM2*, *PRKX*). Taken together, these  
298 findings update the canonical Four Class Model of SCD compensation for  
299 specific Y-linked and X-linked genes, and expand the list of X-linked genes  
300 capable of mediating wider phenotypic consequences of SCD variation.

301

302

303

304

305

306

307

308 **Figure 2 (next page). Data-Driven Partitioning of Sex Chromosome Genes by Dosage**  
309 **Sensitivity. a)** 2D Multidimensional scaling (MDS) plot of sex chromosome genes by their mean  
310 expression profiles ( $\pm$  95% confidence intervals) across all 7 SCD groups. Genes are coded by  
311 both Four Class Model and k-means cluster grouping. Note that MDS2 arranges X-linked genes  
312 along the established gradient of X-linked dosage sensitivity that ranges from extreme XCIE  
313 (XIST), to full XCI. **b)** Cross table showing enrichment of k-means clusters (rows) for Four Class  
314 Model gene groups. Lower-bounds for enrichment odds-ratios are given where mean enrichment  
315 =  $\infty$ . **c)** Dot and line plots showing observed and predicted mean expression values for each k-  
316 means gene cluster across karyotype groups. **d)** Close-up of observed (solid, color-coded) vs.  
317 predicted (dashed, gray) mean ( $\pm$  95% confidence intervals) expression profiles of Green and  
318 Yellow gene clusters. Observed expression profiles still counter predictions when analysis is  
319 restricted to core genes in each cluster with XCIE/XCI status that has been confirmed across  
320 three independent reports (Balaton et al). **e)** Heatmap showing normalized (vs. XX mean)  
321 expression of dosage sensitive genes in the XCIE and XCI k-means groups (rows, color-coded  
322 green and yellow respectively), for each sample (columns, color coded by SCD group). **f)** Pie-  
323 charts showing how genes within XCIE and XCI-enriched k-means clusters (green and yellow  
324 columns respectively), display mirrored over/under-representation for three genomic features of  
325 X-linked gene that have been linked to XCEI in prior research (i) persistence of a surviving Y-  
326 linked homolog, (ii) location of the gene within “younger” evolutionary strata of the X-  
327 chromosome, and (iii) presence of euchromatic rather than heterochromatic epigenetic markers.

328  
329

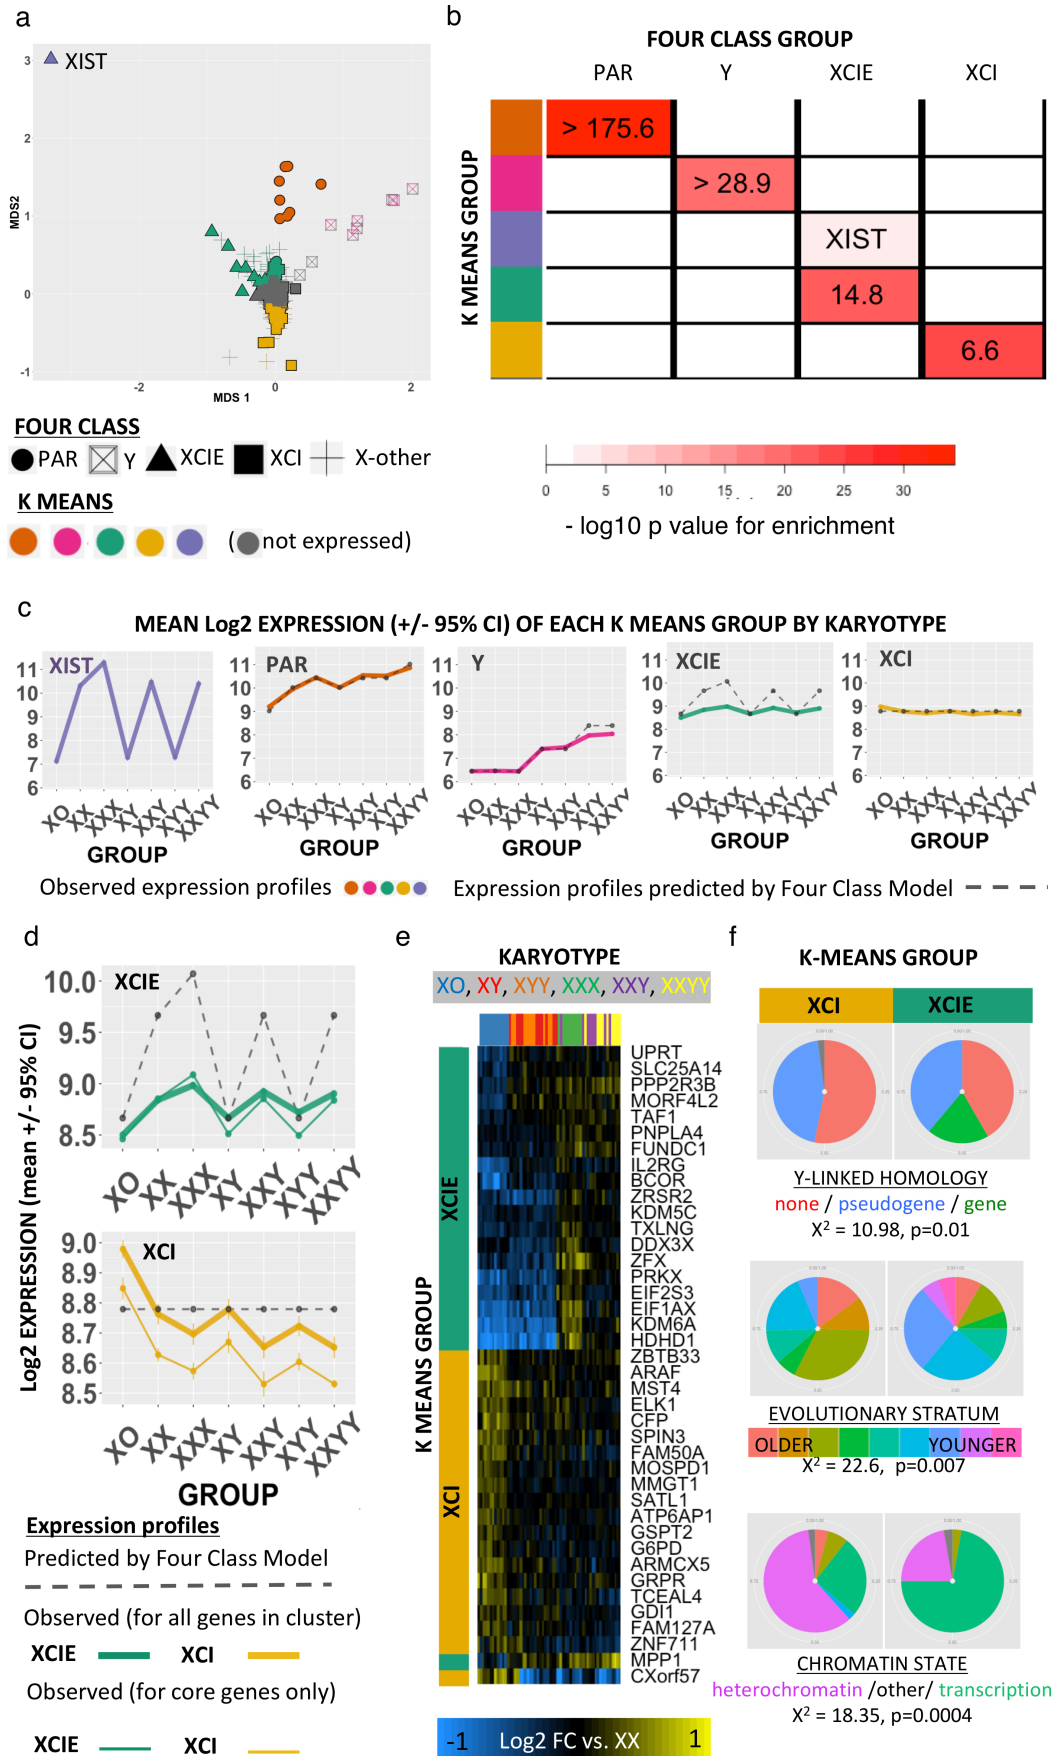

## 331 **Context-Specific Disruption of Autosomal Expression by Sex Chromosome** 332 **Aneuploidy**

333 We next leveraged the diverse SCAs represented in our study to assess  
334 how SCD variation shapes expression on a genome-wide scale. By counting the  
335 total number of differentially expressed genes (DEGs, **Methods**) in each SCA  
336 group relative to its respective euploidic control (i.e XO and XXX compared with  
337 XX; XXY, XYY, XXYY compared with XY), we detected order of magnitude  
338 differences in DEG count amongst SCAs across a range of log<sub>2</sub> fold change  
339 (log<sub>2</sub>FC) cut-offs (**Fig. 3a,b**). We observed an order of magnitude increase in  
340 DEG count with X-chromosome supernumeracy in males vs. females, which  
341 although previously un-described, is congruent with the more severe phenotypic  
342 consequences of X-supernumeracy in males vs. females (17). Overall, increasing  
343 the dosage of the sex chromosome associated with the sex of an individual (i.e.  
344 X in females and Y in males) had a far smaller effect than other types of SCD  
345 changes. Moreover, the ~20 DEGs seen in XXX contrasted with >2000 DEGs in  
346 XO – revealing a profoundly asymmetric impact of X-chromosome loss vs. gain  
347 on the transcriptome of female LCLs, which echoes the asymmetric phenotypic  
348 severity of X-chromosome loss (Turner) vs. gain (XXX) syndromes in females (6).

349 To clarify the relative contribution of sex chromosome vs. autosomal  
350 genes to observed DEG counts with changes in SCD, we calculated the  
351 proportion of DEGs in every SCD group (comparing SCAs to their “gonadal  
352 controls”, and XY males to XX females) that fell within each of four distinct  
353 genomic regions: autosomal, PAR, Y-linked and X-linked (**Fig. 3c**). Autosomal



354 genes accounted for >75% of all DEGs in females with X-monosomy (XO) and  
355 males with X-supernumeracy (XXY, XXYY), but <30% DEGs in all other SCD  
356 groups (**Methods**). These results reveal that SCD changes vary widely in their  
357 capacity to disrupt genome function, and demonstrate that differential  
358 involvement of autosomal genes is central to this variation. Moreover, associated  
359 SCA differences in overall DEG count broadly recapitulate SCA differences in  
360 phenotypic severity.

361

362 **Figure 3 (next page). Genome-wide Effects of Sex Chromosome Dosage Variation. a-b)**

363 Table **a** and corresponding line-plot **b** showing number of genes with significant differential  
364 expression (after FDR correction with  $q < 0.05$ ) in different SCD contrasts at varying  $|\log_2$  fold  
365 change| cut-offs. Note the order-of-magnitude differences between the number of Differentially  
366 Expressed Genes (DEGs) in XO (“removal of X from female”) vs. XXY and XXYY (“addition of X  
367 to male”) vs. XYY and XXX (“addition of Y and X to male and female, respectively”). A  $|\log_2$  fold  
368 change| threshold of 0.26 (~20% change in expression) was applied to categorically define  
369 differential expression in other analyses, by identifying the  $\log_2$  fold change threshold increase  
370 causing the greatest drop in DEG count for each karyotype group, and then averaging this value  
371 across karyotype groups. **c)** Dot-and-line plot showing the proportion of DEGs in each karyotype  
372 group that fell within different regions of the genome. The proportion of all genes in the genome  
373 within each genomic region is shown for comparison. All SCD groups showed non-random DEG  
374 distribution relative to the genome ( $p < 2 \times 10^{-16}$ ), but DEG distributions differed significantly  
375 between SCD groups ( $p < 2 \times 10^{-16}$ ). XO, XXX and XXYY are distinguished from all other SCDs  
376 examined by the large fraction of their overall DEG count that comes from autosomal genes.

377

378

379

a

| DOSAGE CHANGE           | CONTRAST    | LOG2 FOLD CHANGE CUT-OFF |     |    |   |
|-------------------------|-------------|--------------------------|-----|----|---|
|                         |             | 0.26                     | 0.5 | 1  | 2 |
| Loss of X in female     | XO vs. XX   | 2204                     | 469 | 50 | 7 |
| Addition of X in male   | XXY vs. XY  | 268                      | 85  | 13 | 1 |
|                         | XXYY vs. XY | 266                      | 93  | 9  | 2 |
| Addition of Y in male   | XYY vs. XY  | 34                       | 15  | 0  | 0 |
| Addition of X in female | XXX vs. XX  | 28                       | 7   | 3  | 1 |

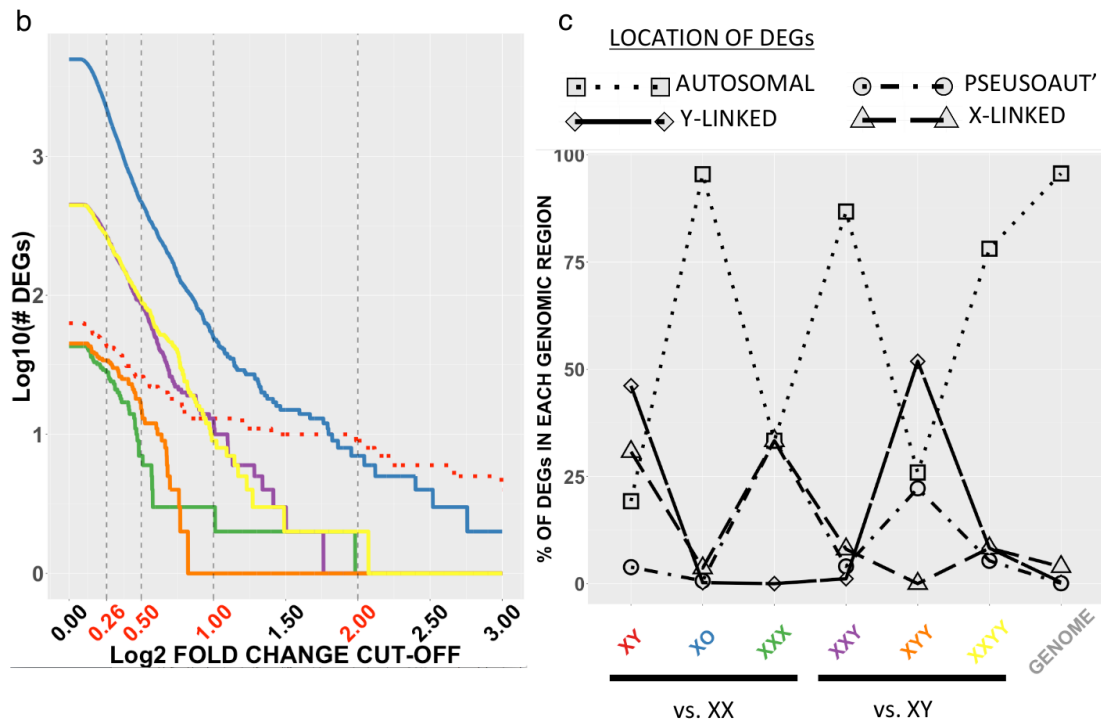

380

381

## 382 Sex Chromosome Dosage Regulates Large-Scale Gene Co-expression

### 383 Networks

384 To provide a more comprehensive systems-level perspective on the  
 385 impact of SCD on genome-wide expression patterns, we leveraged Weighted  
 386 Gene Co-expression Network Analysis (18) (WGCNA, **Methods**). This analytic  
 387 approach uses the correlational architecture of gene expression across a set of  
 388 samples to detect sets (modules) of co-expressed genes. Using WGCNA, we  
 389 identified 18 independent gene co-expression modules in our dataset (**Table S3**).

390 We established that these modules were not artifacts of co-differential expression  
391 of genes between groups by demonstrating their robustness to removal of all  
392 group effects on gene expression by regression (**Fig. S3a**), and after specific  
393 exclusion of XO samples (**Fig. S3b**) given the extreme pattern of DE in this  
394 karyotype (**Fig. 3b**). We focused further analysis on modules meeting 2  
395 independent statistical criteria after correction for multiple comparisons: (i)  
396 significant omnibus effect of SCD group on expression, (ii) significant enrichment  
397 for one or more gene ontology (GO) process/function terms (**Methods, Table S3,**  
398 **Fig. 4a-b**). These steps defined 8 functionally coherent and SCD-sensitive  
399 modules (Blue, Brown, Green, Purple, Red, Salmon, Tan and Turquoise).  
400 Notably, the SCD effects we observed on genome wide expression patterns  
401 appeared to be specific to shifts in sex chromosome gene dosage, as application  
402 of our analytic workflow to publically available genome-wide Illumina beadarray  
403 expression data from LCLs in patients with trisomy 21 (Down syndrome)  
404 revealed a highly dissimilar profile of genome-wide expression change to that  
405 observed in sex chromosome trisomies (**Methods, Fig. 4c, Table S4**).

406 To specify SCA effects on module expression, we compared all  
407 aneuploidy groups to their respective “gonadal controls” (**Fig. 4d**). Statistically  
408 significant differences in modular eigengene expression were seen in XO, XXY  
409 and XXYY groups - consistent with these karyotypes causing larger total DE  
410 gene counts than other SCD variations (**Fig. 3a**). The largest shifts in module  
411 expression were seen in XO, and included robust up-regulation of protein  
412 trafficking (Turquoise), metabolism of non-coding RNA and mitochondrial ATP

413 synthesis (Brown), and programmed cell death (Tan) modules, alongside down-  
414 regulation of cell cycle progression, DNA replication/chromatin organization  
415 (Blue, Salmon), glycolysis (Purple) and responses to endoplasmic reticular stress  
416 (Green) modules. Module DE in those with supernumerary X chromosomes on  
417 an XY background, XXY and XXYY, involved “mirroring” of some XO effects –  
418 i.e. *down-regulation* of protein trafficking (Turquoise) and *up-regulation* of cell-  
419 cycle progression (Blue) modules – plus a more karyotype-specific up-regulation  
420 of immune response pathways (Red).

421         The distinctive up-regulation of immune-system genes in samples of  
422 lymphoid tissue from males carrying a supernumerary X-chromosome carries  
423 potential clinical relevance for one of the best-established clinical phenotypes in  
424 XXY and XXYY syndromes: a strongly (up to 18-fold) elevated risk for  
425 autoimmune disorders (ADs) such as Systemic Lupus Erythmatosus, Sjogren  
426 Syndrome, and Diabetes Mellitus (7). In further support of this interpretation, we  
427 found the Red module to be significantly enriched ( $p=0.01$  by Fisher’s Test, and  
428  $p=0.01$  by gene set permutation) for a set of known AD risks compiled from  
429 multiple large-scale Genome Wide Association Studies (GWAS, **Methods**). The  
430 two GWAS implicated AD risk genes showing strongest connectivity within the  
431 Red module and up-regulation in males bearing an extra X-chromosome were  
432 *CLECL1* and *ELF1* – indicating that these two genes should be prioritized for  
433 further study in mechanisms of risk for heightened autoimmunity in XXY and  
434 XXYY males. Collectively, these results represent the first systems-level  
435 characterization of SCD effects on genome function, and provide convergent

436 evidence that increased risk for AD risk in XXY and XXYY syndrome may be  
437 arise due to an up-regulation of immune pathways by supernumerary X-  
438 chromosomes in male lymphoid cells.

439 To test for evidence of coordination between the changes in sex-  
440 chromosome genes imparted by SCD (**Fig. 2**), and the genome-wide  
441 transcriptomic variations detected through WGCNA (**Fig. 4a**), we asked if any  
442 SCD-sensitive gene co-expression modules were enriched for one or more of the  
443 5 SCD-sensitive clusters of sex chromosome genes (i.e. “PAR”, “Y-linked”,  
444 “XCIE”, “XCI” and the gene XIST). Four WGCNA modules - all composed of  
445 >95% autosomal genes - showed such enrichment (**Fig. 4e**): The Turquoise and  
446 Brown modules were enriched for XCI cluster genes, whereas the Green and  
447 Blue modules were enriched for XCIE cluster genes. The Blue module was  
448 unique for its additional enrichment in PAR genes, and its inclusion of XIST. We  
449 generated network visualizations to more closely examine SCD-sensitive genes  
450 and gene co-expression relationships within each of these four sex-chromosome  
451 enriched WGCNA modules (**Fig. 4f** Blue and **Fig. S3c-e** for others, **Methods**).  
452 The Blue module network highlights XIST, select PAR genes (*SLC25A6*,  
453 *SFRS17A*) and multiple X-linked genes from X-Y gametolog pairs (*EIF1AX*,  
454 *KDM6A (UTX)*, *ZFX*, *PRKX*) for their high SCD-sensitivity, and shows that these  
455 genes are closely co-expressed with multiple SCD-sensitive autosomal genes  
456 including *ZWINT*, *TERF2IP* and *CDKN2AIP*.

457 Our detection of highly-organized co-expression relationships between  
458 SCD sensitive sex-linked and autosomal genes hints at specific regulatory effects

459 of dosage sensitive sex chromosome genes in mediating the genome-wide  
460 effects of SCD variation. To test this, and elucidate potential regulatory  
461 mechanisms, we performed an unbiased transcription factor binding site (TFBS)  
462 enrichment analysis of genes within Blue, Green, Turquoise and Brown WGCNA  
463 modules (**Methods**). This analysis converged on a single TF - ZFX, encoded by  
464 the X-linked member of an X-Y gametolog pair – as the only SCD sensitive TF  
465 showing significant TFBS enrichment in one or more modules. Remarkably, the  
466 gene *ZFX* was itself part of the Blue module, and ZFX binding sites were not only  
467 enriched amongst Blue and Green module genes (increased in expression with  
468 increasing X-chromosome dose), but also amongst Brown module genes that are  
469 downregulated as X-chromosome dose increases (**Fig. 4g**). To directly test if  
470 changes in ZFX expression are sufficient to modify expression of Blue, Green or  
471 Brown modules genes in immortalized lymphocytes, we harnessed existing  
472 gene-expression data from murine T-lymphoblastic leukemia cells with and  
473 without ZFX knockout (19) (GEO GSE43020). These data revealed that genes  
474 downregulated by ZFX knockout in mice have human homologs that are  
475 specifically and significantly over-represented in Blue ( $p=0.0005$ ) and Green  
476 ( $p=0.005$ ) modules ( $p>0.1$  for each of the other 6 WGCNA modules) – providing  
477 experimental validation of our hypothesized regulatory role for ZFX.

478

479

480

481

482

483 **Figure 4 (next page). Weighted Gene Co-expression Network Analysis of Sex Chromosome Dosage**  
484 **Effects. a)** Dot and line plots detailing mean expression ( $\pm$  95% confidence intervals) by SCD group for 8  
485 SCD-sensitive and functionally-coherent gene co-expression modules. **b)** Top 3 GO term enrichments for  
486 each module. **c)** Heatmap showing distinct profile of module DE with a supernumerary chromosome 21 vs. a  
487 supernumerary X-chromosome. **d)** Heatmap showing statistically significant differential expression of gene  
488 co-expression modules between karyotype groups. **e)** Cross tabulation showing enrichment of each module  
489 for the dosage-sensitive clusters of sex-chromosome genes detected by k-means. Lower-bounds for  
490 enrichment odds-ratios are given where mean enrichment =  $\infty$ . **f)** Gene co-expression network for the Blue  
491 module showing the top decile of co-expression relationships (edges) between the top decile of SCD-  
492 sensitive genes (nodes). Nodes are positioned in a circle for ease of visualization. Node shape distinguishes  
493 autosomal (circle) from sex chromosome (square) genes. Sex chromosome genes within the blue module  
494 are color coded by their SCD-sensitivity grouping as per **Figure 2a** (PAR-Orange, XCIE – dark green, XIST  
495 –purple). Larger node and gene name sizes reflect greater SCD sensitivity. Edge width indexes the strength  
496 of co-expression between gene pairs. **g).** ZFX and its target genes from Blue, Green and Brown modules  
497 with significant ZFX TFBS enrichment. Note that expression levels of ZFX (which increases in expression  
498 with mounting X-chromosome dosage) are positively correlated (solid edges) with SCD sensitive genes that  
499 are up-regulated by increasing X-chromosome dose (Blue and Green modules), but negatively correlated  
500 (dashed edges) with genes that are down-regulated by increasing X-chromosome dose (Brown module).  
501



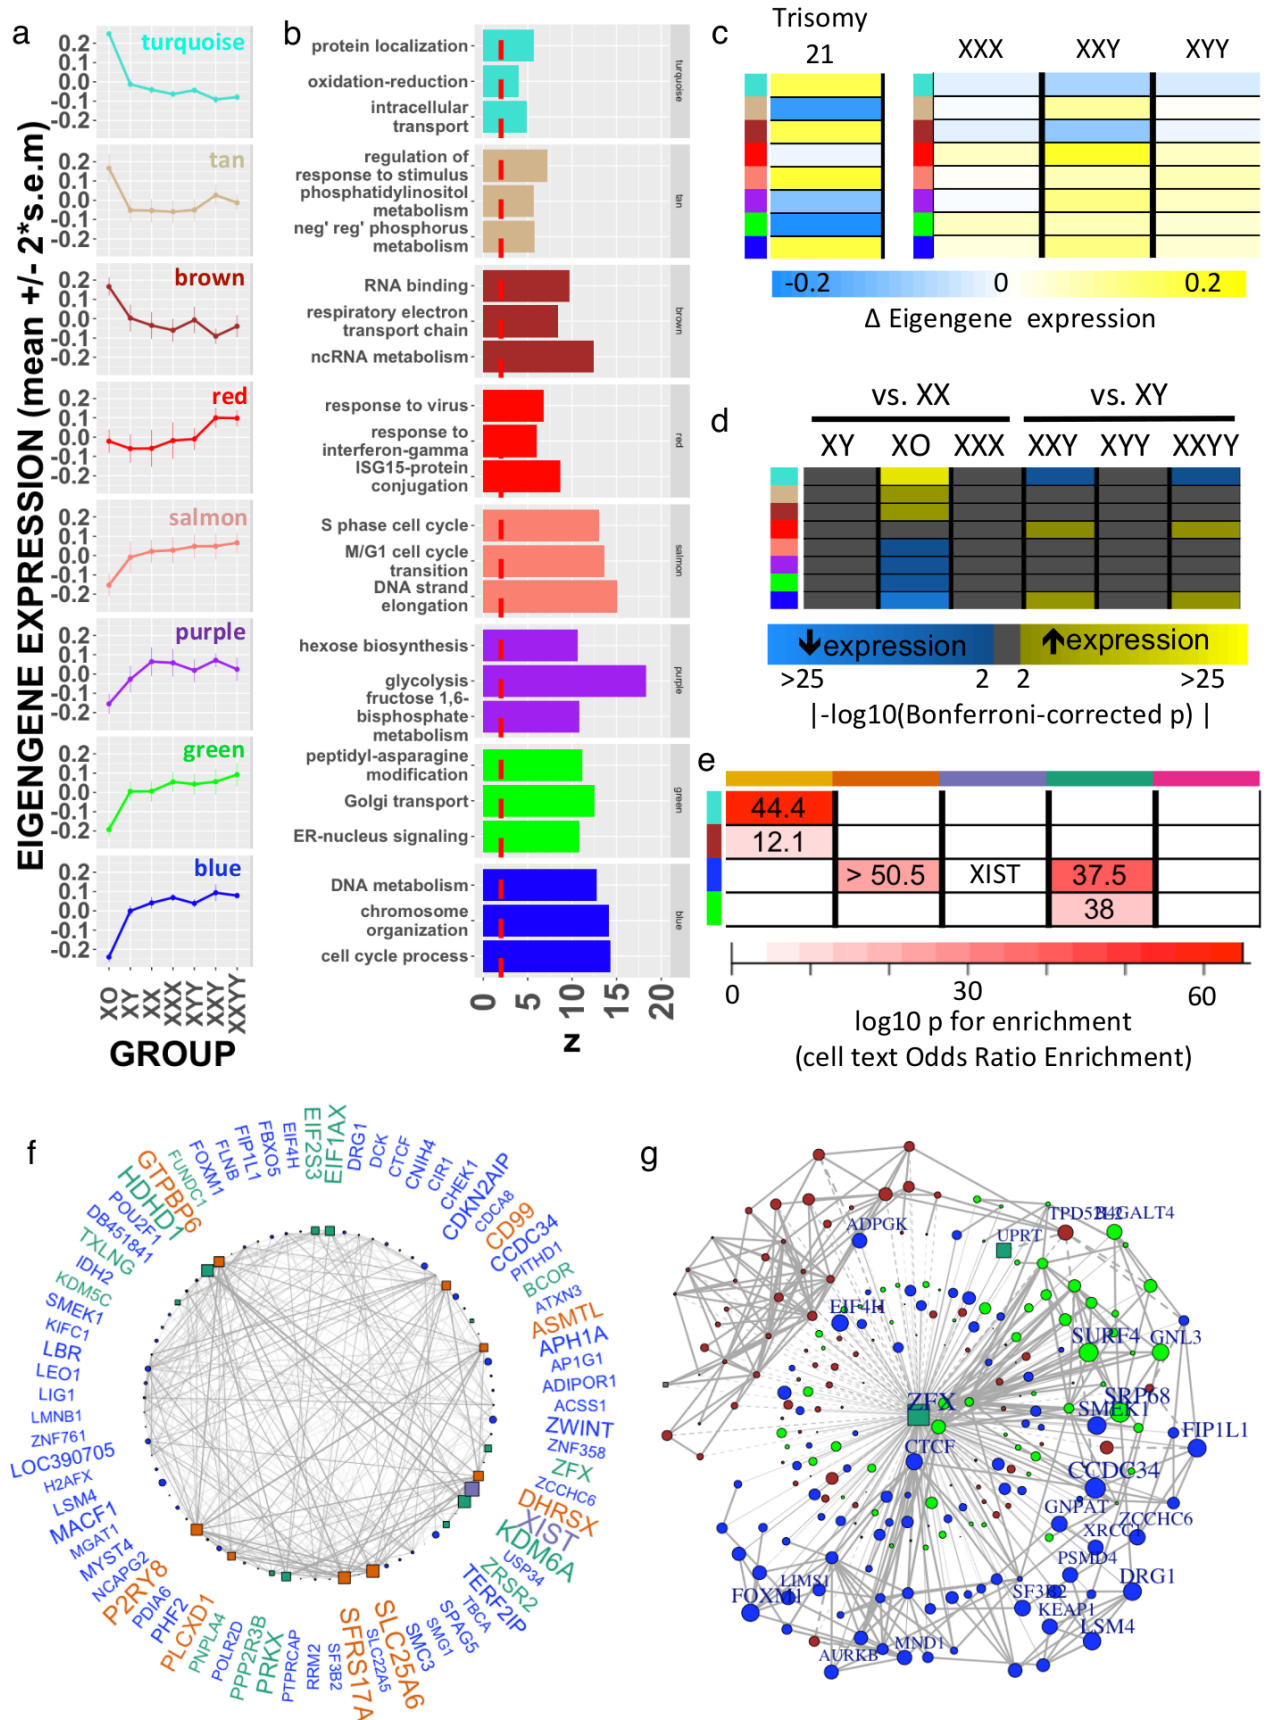



## 503 **DISCUSSION**

504 In conclusion, our study – which systematically examined gene expression  
505 data from 470 individuals representing a total of 9 different sex chromosome  
506 karyotypes - yields several new insights into sex chromosome biology with  
507 consequences for basic and clinical science. First, our discovery and validation of  
508 X-linked genes that are upregulated by reducing X-chromosome count – so that  
509 their expression is elevated in XO vs. XX for example – runs counter to dominant  
510 models of sex chromosome dosage compensation in mammals, and thereby  
511 modifies current thinking regarding which subsets of X-chromosome genes could  
512 contribute to sex and SCA-biased phenotypes (20). We speculate that this newly-  
513 observed non-canonical mode of X-chromosome dosage sensitivity could arise  
514 through one or more of the following candidate mechanisms: (i) repression of X-  
515 linked genes on the active X-chromosome by genes that are expressed from  
516 inactive X-chromosomes, and (ii) sensitivity of X-linked genes on the active X-  
517 chromosome to the changes in nuclear heterochromatin dosage that would follow  
518 from varying numbers of inactivated X-chromosomes (21).

519 Our findings also modify classical models of sex-chromosome biology by  
520 identifying X-linked genes that vary in their expression as a function of Y-  
521 chromosome dosage – indicating that the phenotypic effects of normative and  
522 aneuploidic variations in Y-chromosome dose could theoretically be mediated by  
523 altered expression of X-linked genes. Moreover, the discovery of Y chromosome  
524 dosage effects on X-linked gene expression provides novel routes for  
525 competition between maternally and paternally inherited genes beyond the

526 previously described mechanisms of parental imprinting and genomic conflict–  
527 with consequences for our mechanistic understanding of sex-biased evolution  
528 and disease (22).

529       Beyond their theoretical implications, our data help to pinpoint specific  
530 genes that are likely to play key roles in mediating sex chromosome dosage  
531 effects on wider genome function. Specifically, we establish that a distinctive  
532 group of sex-linked genes - notable for their evolutionary preservation as X-Y  
533 gametolog pairs across multiple species, and the breadth of their tissue  
534 expression in humans (10) – are further distinguished from other sex-linked  
535 genes by their exquisite sensitivity to SCD, and exceptionally close co-  
536 expression with SCD-sensitive autosomal genes. These results add critical  
537 evidence in support of the idea that X-Y gametologs play a key role in mediating  
538 SCD effects on wider genome function. In convergent support of this idea we  
539 show that (i) multiple SCD-sensitive modules of co-expressed autosomal genes  
540 are enriched with TFBS for an X-linked TF from the highly dosage sensitive *ZFX*-  
541 *ZFY* gametolog pair, and (ii) *ZFX* deletion causes targeted gene expression  
542 changes in such modules. Inclusion of *ZFX* in a co-expression module (Blue)  
543 with enriched annotations for chromatin organization and cell cycle pathways is  
544 especially striking given the rich bodies of experimental data which have  
545 independently identified *ZFX* as a key regulator of cellular renewal and  
546 maintenance (23).

547       Gene co-expression analysis also reveal the diverse domains of cellular  
548 function that are sensitive to SCD – spanning cell cycle regulation, protein

549 trafficking and energy metabolism. These effects appear to be specific to shifts in  
550 SCD as they are not induced by trisomy of chromosome 21. Furthermore, gene  
551 co-expression analysis of SCD effects dissects out specific immune activation  
552 pathways that are upregulated by supernumerary X-chromosomes in males, and  
553 enriched for genes known to confer risk for autoimmune disorders that are  
554 overrepresented amongst males bearing an extra X-chromosome. Thus, we  
555 report coordinated genomic response to SCD that could potentially explain  
556 observed patterns of disease risk in SCA.

557 Collectively, these novel insights serve to refine current models of sex-  
558 chromosome biology, and advance our understanding of genomic pathways  
559 through which sex chromosomes can shape phenotypic variation in health, and  
560 sex chromosome aneuploidy.

561

## 562 **MATERIALS AND METHODS**

563

### 564 **Acquisition and preparation of biosamples**

565 RNA was extracted by standard methods (Qiagen, MD, USA) from  
566 lymphoblastoid cell lines (LCLs) for 469 participants recruited through studies of  
567 SCA at the National Institute of Health Intramural Research Program, and  
568 Thomas Jefferson University (24). All participants with X/Y-aneuploidy were non-  
569 mosaic, and stability of karyotype across LCL derivation was confirmed by  
570 chromosome fluorescent in situ hybridization (FISH) in all members of a  
571 randomly selected subset of 9 LCL samples representing each of the 4

572 supernumerary SCA groups included in our microarray analysis. Sixty-eight  
573 participants provided RNA samples for microarray analyses (12 XO, 10 XX, 9  
574 XXX, 10 XY, 8 XXY, 10 XYY, 9 XXYY), and 40 participants provided RNA  
575 samples for a separate qPCR validation/extension study (4 XO, 145 XX, 22 XXX,  
576 146 XY, 34 XXY, 16 XYY, 17 XXYY, 8 XXXY, 10 XXXXY). The microarray and  
577 qPCR samples were fully independent of each other (biological replicates), with  
578 the exception of 2 XO participants in the microarray study, who each also  
579 provided a separate LCL sample for the qPCR study (**Table S1**).

580

## 581 **Microarray data preparation, differential expression analysis, annotation** 582 **and probe selection**

583 Gene expression was profiled using the Illumina HT-12 v4 Expression  
584 BeadChip Kit (Illumina Inc, San Diego, CA). Expression data were quantile  
585 normalized across arrays and log<sub>2</sub> transformed using the *limma* package in  
586 R(25). For each of 47323 probes, we estimated mean expression by karyotype  
587 group, and log<sub>2</sub> fold change in gene expression for each unique pairwise group  
588 contrast between karyotype groups (**Fig. 1a**), along with their associated false-  
589 discover-rate (FDR) corrected p-values. For each pairwise karyotype group  
590 comparison, we identified probes with significant log<sub>2</sub> fold-changes that survived  
591 FDR correction for multiple comparisons across all 47323 probes with  $q$  (the  
592 expected proportion of falsely rejected nulls) set at 0.05. We also calculated a  
593 single summary estimate of SCD effects for each probe, by calculating the

594 proportion of variance ( $r^2$ ) in probe expression that was accounted for by the 7-  
595 level factor of SCD group.

596 All 47323 microarray probes were annotated using both the vendor  
597 manifest file and an independently published re-annotation that assigns a quality  
598 rating to each probe based on the specificity of its alignment to the purported  
599 transcript target (26). We filtered for all probes with “perfect” or “good” quality  
600 alignment to a known gene according to this reannotation, and then used the  
601 *collapseRows* function from the WGCNA (27) package in R (with default  
602 settings), to select one probe per gene. We also applied a further filter to remove  
603 any Y-linked probes that showed differential expression between female  
604 karyotype groups. These steps resulted in high-quality measures of expression  
605 and estimates of differential expression for 19984 autosomal and 894 sex-  
606 chromosome genes in each of 68 independent samples from 7 different  
607 karyotype groups.

608 To select a log<sub>2</sub> threshold for use in categorical definition of differentially  
609 expressed genes (DEGs), we estimated DEG count across a range of absolute  
610 log<sub>2</sub> fold-change cut-offs for 6 contrasts of primary interest: karyotypically normal  
611 males vs. females (i.e. XY vs. XX), and each SCA group vs. its respective  
612 “gonadal control” (i.e. XX was the control for XO and XXX groups / XY was the  
613 control for XXY, XYY and XXYY). An absolute log<sub>2</sub> fold change of 0.26  
614 (equivalent to a ~20% increase/decrease in expression) was empirically selected  
615 as the cut-off to define differential expression by (i) separately identifying the  
616 increase in log<sub>2</sub>FC threshold that cause the greatest drop in DEG count for each

617 SCA group, (ii) averaging these log<sub>2</sub>FC thresholds across all 5 SCA groups.  
618 Thus in any contrast between two karyotype groups, DEGs showed log 2 fold-  
619 changes that met both of the following two criteria: an associated p value that  
620 met FDR correction with  $q < 0.05$ , and an absolute magnitude greater than 0.26.

621

### 622 **Identifying Genes Showing Significant Differential Expression Across All** 623 **Sampled Changes in X- and Y-Chromosome Count**

624 The 21 unique pairwise karyotype group comparisons in our microarray  
625 dataset included 15 contrasts involving a disparity in X-chromosome count, and  
626 16 contrasts involving a disparity in Y-chromosome count (**Fig. 1a**). Using the  
627 empirically-defined  $|\log_2 \text{fold change}|$  cut-off of 0.26 (see above), we screened all  
628 20878 genes for evidence of significant differential expression across all  
629 instances of X- or Y-chromosome disparity.

630

### 631 **Comparing SCD Sensitivity of Gametolog vs. non-Gametolog Sex-Linked** 632 **Genes**

633 Fourteen of 16 established (9) X-Y gametolog gene pairs were  
634 represented in our microarray dataset. To compare the SCD sensitivity of this  
635 gene set to that of non-gametolog sex-linked genes we first quantified the mean  
636 effect of SCD group on gene expression within the gametolog gene set by  
637 averaging gene-wise r-squared values for the effect of SCD group on expression.  
638 We then determined the centile of this observed gene set mean r-squared  
639 against a distribution of r-squared values for 10,000 similarly sized sets of

640 randomly sampled non-gametolog sex-linked genes (**Fig. 1d**). This procedure  
641 was conducted separately for X- and Y-chromosomes.

642

### 643 **A Priori Assignment of Sex Chromosome Genes to Four Class Model** 644 **Categories**

645 PAR genes were defined as those lying distal to the PAR1 and PAR2  
646 boundaries specified in hg18 build of the human genome. Y-linked and X-linked  
647 genes were defined as those lying proximal to these PAR boundaries on the Y-  
648 and X-chromosome respectively. X-linked genes were assigned to XCIE and XCI  
649 using consensus classifications from a systematic integration (8) of XCI calls  
650 from 3 large-scale assays: expression from the inactivated human X-  
651 chromosome in 9 hybrid human-mouse cell lines (12), allelic-imbalance analysis  
652 of expression data in cell-lines from females with skewed X-inactivation (28), and  
653 X-chromosome methylation data from microarray (29). According to the XCI  
654 categories of this consensus report we classified X-linked genes as X-inactivated  
655 (“Subject” or “Mostly Subject” categories), X-escape (“Escape” or “Mostly  
656 Escape” categories), or X-other (all other intermediate categories).

657

### 658 **Clustering of Sex Chromosome Genes by Dosage Sensitivity**

659 For all 894 sex chromosome genes within our dataset we calculated the  
660 mean fold-change per SCD group relative to mean expression across all SCD  
661 groups. The resulting 894 by 7 matrix was submitted to k-means clustering  
662 across a range of k-values using the *kmeans* function in R with *nstart* and

663 iter.max set at 100. Visual inspection of a scree plot of mean within partition sum-  
664 of-squared residuals against k indicated an optimal 6-cluster solution (**Fig. S2a**).  
665 The largest of these 6 clusters (Gray cluster) gathered genes with low or  
666 undetectable expression levels across all samples, and was excluded from  
667 further analysis.

668         Reproducibility of 6 cluster solution was established using a bootstrap  
669 method whereby individuals were randomly drawn (with replacement) from each  
670 SCD group within our microarray dataset to derive 1000 bootstrap sets of 68  
671 samples. k-means clustering was repeated for each of these 1000 sets to define  
672 a 6-cluster solution in each draw (**Fig. S2b**). Consistency of clustering was  
673 quantified for each gene as the proportion of bootstrap draws in which it was  
674 assigned to the same cluster as it had been in the original sample. The median  
675 consistency score for cluster designation was >93% for all 5 clusters of SCD-  
676 sensitive sex chromosome genes.

677         The observed grouping of sex chromosome genes from k-mean  
678 clustering, was compared with the predicted Four Class Model groupings using  
679 two-tailed Fishers tests for all pairwise cluster-grouping combinations (**Fig. 2b**).

680

## 681 **Modelling X- and Y-chromosome Dosage Effects on Expression of Sex** 682 **Chromosome Gene Clusters**

683         We used the following linear models to estimate the combined influence of  
684 X and Y chromosome dosage in cluster and gene-level expression of Yellow  
685 (XCI enriched) and Green (XCIE enriched) gene clusters:



686 Expression  $\sim \beta_0$  (intercept) +  $\beta_1$ (X\_count) +  $\beta_2$ (Y\_count) + error

687 We computed p-values for comparisons of both  $\beta_1$  and  $\beta_2$  coefficient  
688 estimates against the null (0), and used these to test for significant directional  
689 effects of sex chromosome dosage on the mean expression of each gene  
690 cluster, as well the expression of individual genes within each cluster.

691

### 692 **Aligning Sex Chromosome Expression, Epigenetic and Evolutionary Data**

693 We validated our data-driven clustering of X-linked genes into Yellow (XCI  
694 enriched) and Green (XCIE enriched) groups, by overlapping the genomic  
695 coordinates of gene probes with segmentations of the X-chromosome according  
696 to (i) “chromatin states” defined by computational analysis of coordinated  
697 changes in 10 distinct chromatin marks in LCLs (16), (ii) “evolutionary strata”  
698 reflecting staged loss of recombination between the X- and Y-chromosome (15).  
699 Overlaps of our probe coordinate with these two annotations were defined using  
700 the GenomicRanges package in R. As a third validation we also aligned our  
701 clustering of X-lined genes with a previously published annotation of X-linked  
702 genes according to whether their corresponding ancestral Y-linked homologue  
703 has been lost, converted to a pseudogene or maintained (8). Non-random  
704 associations between these three annotations and Yellow vs. Green k-means  
705 cluster membership were assessed using Chi-squared tests.

706

707

708

## 709 **Comparison of DEG Count and Genomic Distribution Across SCA Groups**

710 Total DEG counts were compared across SCD groups across a range of  
711 log 2 fold change cut-offs as described above and reported in **Fig. 3 a,b**. To test  
712 for non-random distribution of DEGs across the genome in each SCD group (**Fig.**  
713 **3c**), we compared observed DEG counts across 4 genomic regions - autosomal,  
714 PAR, Y-linked and X-linked - to the background distribution of total gene counts  
715 across these regions using the prop.test function in R. All SCD groups showed a  
716 high non-random distribution of DEGs across the genome – reflecting preferential  
717 involvement of sex chromosome genes ( $p < 7.2 * 10^{-13}$ ).

718

## 719 **Quantitative rtPCR validation of Differentially-Expressed Genes in**

### 720 **Microarray**

721 *Selecting genes of interest:* For selected genes showing significant differential  
722 expression between karyotype groups in our core sample, we used qPCR to  
723 validate and extent observed fold-changes in an independent sample of 402  
724 participants representing all the karyotypes in our core sample plus two  
725 additional SCAs: XXXY, and XXXXY. Selection of specific genes for qPCR  
726 validation was as follows. From the set of 10 sex-linked genes with patterns of  
727 “obligate” dosage sensitivity (**Fig 1b**), we selected XIST, the 2 most X-  
728 chromosome sensitive X-linked gametologs [EIF1AX, KDM6A(UTX)], and the 2  
729 most Y-chromosome sensitive Y-linked gametologs (ZFY, DDX3Y). All genes  
730 selected for qPCR from the sets of dosage sensitive sex chromosome genes  
731 defined by k-means clustering (**Fig. 2a,b**) showed (i) stable cluster membership

732 in >95% of bootstrap draws (**Fig. S2b**), and (ii) consistent inclusion in the top 10  
733 DEGs across multiple relevant group contrasts for that k-means cluster (Pink Y-  
734 linked cluster: XYY vs. XY and XXYY vs. XXY | Yellow XCI and Green XCIE  
735 clusters: XO vs. XXX, XO vs. XY, XXY vs. XX).

736 *Fluidigm qPCR protocol:* Reverse Transcription reaction was performed using  
737 RT2 HT First Strand Kit (QIAGEN, 330411) with 1000 ng RNA input per sample.  
738 One-tenth of cDNA was preamplified using RT2 Microfluidics qPCR Reagent  
739 system (QIAGEN, 330431) in combination with custom RT2 PreAmp pathway  
740 primer mix Format containing 94 RT2 primer assays. Fourteen cycles of  
741 preamplification were performed using the manufacturer recommended  
742 preamplification protocol. Amplified cDNA was diluted 5-fold using RNase-free  
743 water and assessed in real-time PCR using the RT2 Microfluidics EvaGreen  
744 qPCR Master mix and a Custom RT2 profiler PCR array PCR Array containing  
745 96 assays, including selected DEGs of interest, housekeeping genes, reverse-  
746 transcription controls, and positive PCR control. Real-time PCR was performed  
747 on a Fluidigm BioMark HD (Fluidigm, San Francisco, US) using the RT2 cycling  
748 program for the Fluidigm BioMark, which consists of an initial thermal mix stage  
749 (50°C for 2 minutes, 70°C for 30 minutes, and 25°C for 10 minutes) followed by a  
750 hot start at 95°C for 10 minutes and 40 cycles of 94°C for 15 seconds, and 60°C  
751 for 60 seconds. For data processing, an assay with Ct > 23 was deemed to be  
752 not expressed.

753 *Differential Expression Analysis of qPCR data:* The  $\Delta\Delta CT$  method of relative  
754 quantification was used to analyze qPCR data (30). To provide normalized

755 estimates of expression for each gene we calculated  $\Delta$ CT values, by subtracting  
756 the CT for each gene of interest from the mean CT of two housekeeping genes  
757 (GAPDH and RPLP0) which were not differentially expressed across groups in  
758 either microarray or qPCR data. Thus, larger  $\Delta$ CT values reflected greater  
759 normalized expression relative to mean expression of the reference  
760 housekeeping genes. These  $\Delta$ CT values were used as input for calculation of all  
761 unique pairwise group differences in expression between karyotype groups  
762 represented in the independent qPCR validation dataset. Group differences in  
763 expression were modeled using the limma R package with identical setting to  
764 those used in analysis of microarray data (see above). The resulting  $\Delta\Delta$ CT  
765 represent fold-changes in gene expression between groups, on a log scale with a  
766 base determined by the effective qPCR efficiency.

767 *Validation Microarray Results Using qPCR Results:* All 21 unique pairwise SCD  
768 group contrasts in our microarray sample could be reproduced in the  
769 independent qPCR dataset. We used the correlation across these 21 group  
770 contrasts for the qPCR fold-change and microarray log<sub>2</sub> fold change to quantify  
771 the degree of agreement between qPCR and microarray findings (**Fig. S1a and**  
772 **Fig. S2d,e**).

773 *Extension of Microarray Results Using qPCR Results:* The qPCR dataset also  
774 included two SCD groups that were not represented in the microarray dataset –  
775 XXXY and XXXXY – allowing for a total of 15 novel pairwise SCD group  
776 contrasts ("XO-XXXY", "XO-XXXXY", "XXXY-XX", "XXXXY-XX", "XXX-XXXY", "XXX-  
777 XXXXY", "XXXY-XY", "XXXXY-XY", "XXY-XXXY", "XXY-XXXXY", "XYY-XXXY", "XYY-  
778 XXXXY", "XXYY-XXXY", "XXYY-XXXXY", "XXXY-XXXXY") sampling diverse disparities of

779 X- and Y-chromosome dosage. These novel contrasts were used as a further  
780 test for the validity and reproducibility of our microarray findings. Each of the 15  
781 novel pairwise SCD group contrasts was coded according to two effects of  
782 interest: difference in X-chromosome count and difference in Y-chromosome  
783 count. These coded SCD disparities were then correlated with observed fold-  
784 changes for unique pairwise group contrasts in the qPCR dataset to test if  
785 patterns of fold-change observed in the microarray dataset could be extension  
786 into unseen karyotype groups (**Fig. S1b,c**: X- and Y-linked genes with  
787 “obligatory” sex chromosome dosage sensitivity | **Fig. S2f,g**: X-linked genes from  
788 the “Yellow” and “Green” k-means that countered expectations of the classical  
789 Four Class Model).

790

### 791 **Weighted Gene Co-expression Network Analysis (WGCNA)**

792 *Defining Gene Co-expression Modules*: Gene co-expression modules were  
793 generated using the R package Weighted Gene Co-expression Network Analysis  
794 (WGCNA). Briefly, this involved first calculating the Pearson correlation  
795 coefficient between all 20978 genes across all 68 samples in our study. This  
796 correlation matrix was transformed using a signed power adjacency function with  
797 a threshold power of 12 (selected based on fit to scale-free topology), and then  
798 converted into Topological Overlap Matrix (TOM) by modifying the correlation  
799 between each pair of genes using a measure of the similarity in their respective  
800 correlations with all other genes (31). The resulting TOM was then converted to a  
801 distance matrix by subtraction from 1, and used to generate a dendrogram for

802 clustering genes into modules. Gene modules were defined using the Dynamic  
803 Hybrid cutree function (32) [with the following parameter settings: deepSplit  
804 (control over sensitivity of module detection to module splitting) = 2,  
805 mergeCutHeight (distance below which modules are merged)= 0.25, minimum  
806 module size=30)]. Given the large number of genes included in our analyses, we  
807 implemented module detection using the “blockwise” WGCNA algorithm, which  
808 starts with a computationally inexpensive method to assort genes into smaller co-  
809 expression blocks, and then completes the above steps within each block before  
810 merging module designations across blocks. This implementation of WGCNA  
811 defined 18 mutually exclusive co-expression gene modules within our data,  
812 which ranged from 45 to 1393 genes in size, and a left-over group of 14630  
813 genes without module membership (**Table S3**). The expression of each module  
814 was summarized as a module eigengene value (ME: the right singular vector of  
815 standardized expression values for genes in that module) in every sample. These  
816 ME values were used to determine differential expression of modules across  
817 (omnibus F-tests) and between (T-tests) SCD groups, as well as module co-  
818 expression across samples (Pearson correlation coefficient).

819 *Further characterizing gene co-expression modules:* We used module  
820 preservation analysis to establish that our defined co-expression modules were  
821 not dominated by (i) the large number of DEGs induced by X-monosomy (using  
822 expression data excluding XO samples), or (ii) other SCD group differences in  
823 mean expression levels (using expression data after residualization for the  
824 effects of SCD group and re-centering at a common mean). All modules showed

825 high reproducibility based on a module-specific  $Z_{\text{summary}}$  scores derived by  
826 comparing observed modular connectivity and density metrics with null values  
827 generated by 200 permutations of gene-level module membership(33). We  
828 focused further characterization of modules which passed two independent  
829 statistical criteria; (i) SCD sensitivity - quantified using F-tests for the omnibus  
830 effects of karyotype group on modular expression quantified as the ME, (ii)  
831 functional coherence as inferred by analysis of modular gene ontology term  
832 enrichments using GO elite (34), and Gorilla (35).

833 *Testing for enrichment of autoimmune disorder risk genes in WGCNA modules:*  
834 A large-scale records-based study was used to define 10 Autoimmune Disorder  
835 (ADs) with clearly elevated prevalence rates in XXY vs. XY males (7), 9 of which  
836 were represented in the largest available catalog of Genome Wide Association  
837 Study (GWAS) findings (<https://www.ebi.ac.uk/gwas/>): Diabetes Mellitus type 1,  
838 Multiple Sclerosis, Autoimmune Hypothyroidism, Psoriasis, Rheumatoid Arthritis,  
839 Sjogren's Syndrome, Systemic Lupus Erythematosus, Ulcerative Colitis, and  
840 Coeliac Disease. A total of 495 genes within our microarray sample were  
841 annotated for showing a significant association in GWAS with one or more of  
842 these 9 AD conditions. Overrepresentation of this AD gene set in the XXY  
843 upregulated Red gene co-expression module was tested for using both Fisher's  
844 exact test ( $p=0.01$ ), and by comparing the observed representation of AD genes  
845 against a null distribution generated by 10,000 random gene samples of equal  
846 size to the red module.

847 *Testing for patterned enrichment of dosage sensitive sex chromosome genes in*  
848 *WGCNA modules:* We tested if any of the 8 SCD-sensitive and functionally  
849 enriched WGCNA modules showed enrichment for the previously derived k-  
850 means clusters of dosage sensitive sex chromosome genes (**Fig. 2**) by applying  
851 two-tailed Fishers tests to all pairwise module-cluster combinations (**Fig. 4 e**). All  
852 observed associations survived Bonferroni correction for multiple comparisons.

853 *Module Visualization:* WGCNA co-expression modules were visualized by  
854 selecting genes within the top decile of SCD-sensitivity (indexed using r-squared  
855 for proportion of expression variance explained by group), and edges (co-  
856 expression links between genes) in the top decile of edge strengths. All  
857 visualizations were constructed using the igraph R package in R.

858 *Transcription factor binding site analyses:* Transcription factor binding site  
859 (TFBS) enrichment analysis was performed each of the 4 SCD-sensitive  
860 WGCNA modules - Blue, Green, Turquoise and Brown - that were enriched for  
861 inclusion of gene from one or more of the 5 SCD-sensitive clusters of sex  
862 chromosome genes. In each module, we scanned canonical promoter regions  
863 (1000bp upstream of the transcription start site) for the top 500 genes with  
864 strongest intramodular “connectivity” (based on kME - the magnitude of each  
865 gene’s coexpression with its module’s eigengene). Next we utilized TFBS  
866 position weight matrices (PWMs) from JASPAR database (205 non-redundant  
867 and experimentally defined motifs) (36) to examine the enrichment for  
868 corresponding TFBS within each module. For TFBS enrichment all the modules  
869 were scanned with each PWMs using the Clover algorithm (37). To compute the



870 enrichment analysis, we utilized three different background datasets (1000 bp  
871 sequences upstream of all human genes, human CpG islands and human  
872 chromosome 20 sequence). To increase confidence in the enrichment analyses,  
873 we considered TFBS to be over-represented based on the P-values ( $<0.05$ )  
874 obtained relative to all the three corresponding background datasets.

875 *Enrichment of SCD sensitive modules for genes with DE due to experimental*  
876 *ZFX knockout.* To provide an orthogonal experimental test for evidence of a  
877 regulatory role for ZFX within Blue, Green or Brown WGCNA modules, we used  
878 a list of genes with significantly decreased expression due to ZFX knockout in  
879 murine lymphocytes(19). Human homologs were found for these genes  
880 (<http://www.informatics.jax.org/downloads/reports/index.html>), and two-tailed  
881 Fishers Tests were used to assess if these human genes were significantly  
882 enriched/impooverished in any of the 8 SCD sensitive WGCNA modules.

883

#### 884 **Comparison of Autosomal Gene Fold-Change in SCA and Down Syndrome**

885 The transcriptomic effects on Trisomy 21 (T21) were characterized in  
886 LCLs by passing a publically available Illumina microarray gene expression  
887 dataset (GEO, Accession number GSE34458) through an identical analytic  
888 pipeline to that used in characterizing genome-wide fold changes in our SCA  
889 sample (see above). We first independently confirmed the previously reported  
890 finding that chromosome 21 was robustly enriched for genes showing differential  
891 expression in this T21 data set (Chi-squared=999,  $p < 2 \times 10^{-16}$  for enrichment of  
892 DEGs on chromosome 21) – buttressing use of these data to assess

893 transcriptomic effects of T21. We examined overlaps in genome-wide expression  
894 change between T21 and the three sex-chromosome trisomes in our samples  
895 (XXY, XYY and XXX) using 17671 genes with complete expression data in both  
896 microarray datasets (after exclusion of genes on chromosomes X, Y and 21).  
897 We tested for, and failed to find any evidence of significant overlap in DEGs  
898 using Chi-squared tests (**Table S4**). To test if T21 showed a similar shift in gene  
899 co-expression modules to sex chromosome trisomies, we used the designation  
900 of genes to modules in the SCA sample to recalculate module Eigengenes. We  
901 then calculated MR fold changes for T21 and three SCA trisomies (XXX, XXY  
902 and XYY). Trisomy of chromosome 21 was associated with a clearly distinct  
903 profile of ME expression change than all three of the SCA trisomies (**Fig. 4c**).

## REFERENCES

1. Hughes JF, Rozen S (2012) Genomics and genetics of human and primate y chromosomes. *Annu Rev Genomics Hum Genet* 13:83–108.
2. Arnold AP (2012) The end of gonad-centric sex determination in mammals. *Trends Genet* 28(2):55–61.
3. Bermejo-Alvarez P, Rizos D, Rath D, Lonergan P, Gutierrez-Adan A (2010) Sex determines the expression level of one third of the actively expressed genes in bovine blastocysts. *Proc Natl Acad Sci U S A* 107(8):3394–3399.
4. Petropoulos S, et al. (2016) Single-Cell RNA-Seq Reveals Lineage and X Chromosome Dynamics in Human Preimplantation Embryos. *Cell* 165(4):1012–1026.
5. Belling K, et al. (2017) Klinefelter syndrome comorbidities linked to increased X chromosome gene dosage and altered protein interactome activity. *Hum Mol Genet* 26(7):1219–1229.
6. Hong DS, Reiss AL (2014) Cognitive and neurological aspects of sex chromosome aneuploidies. *Lancet Neurol* 13(3):306–318.
7. Seminog OO, Seminog AB, Yeates D, Goldacre MJ (2015) Associations between Klinefelter’s syndrome and autoimmune diseases: English national record linkage studies. *Autoimmunity* 48(2):125–128.
8. Balaton BP, Cotton AM, Brown CJ (2015) Derivation of consensus inactivation status for X-linked genes from genome-wide studies. *Biol Sex Differ* 6:35.
9. Skaletsky H, et al. (2003) The male-specific region of the human Y chromosome is a mosaic of discrete sequence classes. *Nature* 423(6942):825–37.
10. Bellott DW, et al. (2014) Mammalian Y chromosomes retain widely expressed dosage-sensitive regulators. *Nature* 508(7497):494–499.
11. Deng X, Berletch JB, Nguyen DK, Disteche CM (2014) X chromosome regulation: diverse patterns in development, tissues and disease. *Nat Rev Genet* 15(6):367–378.
12. Carrel L, Willard HF (2005) X-inactivation profile reveals extensive variability in X-linked gene expression in females. *Nature* 434(7031):400–4.

13. Tukiainen T, et al. (2017) Landscape of X chromosome inactivation across human tissues. *Nature* 550(7675):244–248.
14. Wilson Sayres MA, Makova KD (2013) Gene survival and death on the human Y chromosome. *Mol Biol Evol* 30(4):781–787.
15. Pandey RS, Wilson Sayres MA, Azad RK (2013) Detecting evolutionary strata on the human x chromosome in the absence of gametologous y-linked sequences. *Genome Biol Evol* 5(10):1863–1871.
16. Ernst J, et al. (2011) Mapping and analysis of chromatin state dynamics in nine human cell types. *Nature* 473(7345):43–49.
17. Aksglaede L, Juul A (2013) Testicular function and fertility in men with Klinefelter syndrome: a review. *Eur J Endocrinol Eur Fed Endocr Soc* 168(4):R67-76.
18. Parikshak NN, Gandal MJ, Geschwind DH (2015) Systems biology and gene networks in neurodevelopmental and neurodegenerative disorders. *Nat Rev Genet* 16(8):441–458.
19. Weisberg SP, et al. (2014) ZFX controls propagation and prevents differentiation of acute T-lymphoblastic and myeloid leukemia. *Cell Rep* 6(3):528–540.
20. Disteche CM (2016) Dosage compensation of the sex chromosomes and autosomes. *Semin Cell Dev Biol* 56:9–18.
21. Wijchers PJ, Festenstein RJ (2011) Epigenetic regulation of autosomal gene expression by sex chromosomes. *Trends Genet TIG* 27(4):132–140.
22. Cocquet J, et al. (2012) A genetic basis for a postmeiotic x versus y chromosome intragenomic conflict in the mouse. *PLoS Genet* 8(9):e1002900.
23. Galan-Cardiad JM, et al. (2007) Zfx controls the self-renewal of embryonic and hematopoietic stem cells. *Cell* 129(2):345–357.
24. Zinn AR, et al. (2007) A Turner syndrome neurocognitive phenotype maps to Xp22.3. *Behav Brain Funct BBF* 3:24.
25. Ritchie ME, et al. (2015) limma powers differential expression analyses for RNA-sequencing and microarray studies. *Nucleic Acids Res* 43(7):e47.
26. Barbosa-Morais NL, et al. (2010) A re-annotation pipeline for Illumina BeadArrays: improving the interpretation of gene expression data. *Nucleic Acids Res* 38(3):e17.

27. Langfelder P, Horvath S (2008) WGCNA: an R package for weighted correlation network analysis. *BMC Bioinformatics* 9:559.
28. Cotton AM, et al. (2013) Analysis of expressed SNPs identifies variable extents of expression from the human inactive X chromosome. *Genome Biol* 14(11):R122.
29. Cotton AM, et al. (2015) Landscape of DNA methylation on the X chromosome reflects CpG density, functional chromatin state and X-chromosome inactivation. *Hum Mol Genet* 24(6):1528–1539.
30. Schmittgen TD, Livak KJ (2008) Analyzing real-time PCR data by the comparative C(T) method. *Nat Protoc* 3(6):1101–1108.
31. Zhang B, Horvath S (2005) A general framework for weighted gene co-expression network analysis. *Stat Appl Genet Mol Biol* 4:Article17.
32. Langfelder P, Zhang B, Horvath S (2008) Defining clusters from a hierarchical cluster tree: the Dynamic Tree Cut package for R. *Bioinforma Oxf Engl* 24(5):719–720.
33. Langfelder P, Luo R, Oldham MC, Horvath S (2011) Is my network module preserved and reproducible? *PLoS Comput Biol* 7(1):e1001057.
34. Zambon AC, et al. (2012) GO-Elite: a flexible solution for pathway and ontology over-representation. *Bioinforma Oxf Engl* 28(16):2209–2210.
35. Eden E, Navon R, Steinfeld I, Lipson D, Yakhini Z (2009) GOrilla: a tool for discovery and visualization of enriched GO terms in ranked gene lists. *BMC Bioinformatics* 10:48.
36. Portales-Casamar E, et al. (2010) JASPAR 2010: the greatly expanded open-access database of transcription factor binding profiles. *Nucleic Acids Res* 38(Database issue):D105-110.
37. Frith MC, et al. (2004) Detection of functional DNA motifs via statistical over-representation. *Nucleic Acids Res* 32(4):1372–1381.
